# Supplementary figures and images for: Genome-Wide Analysis of the PIN Auxin Efflux Carrier Gene Family in Coffee
Source: MDPI journal article supplement (doi:10.3390/plants9091061), 2020-08-19

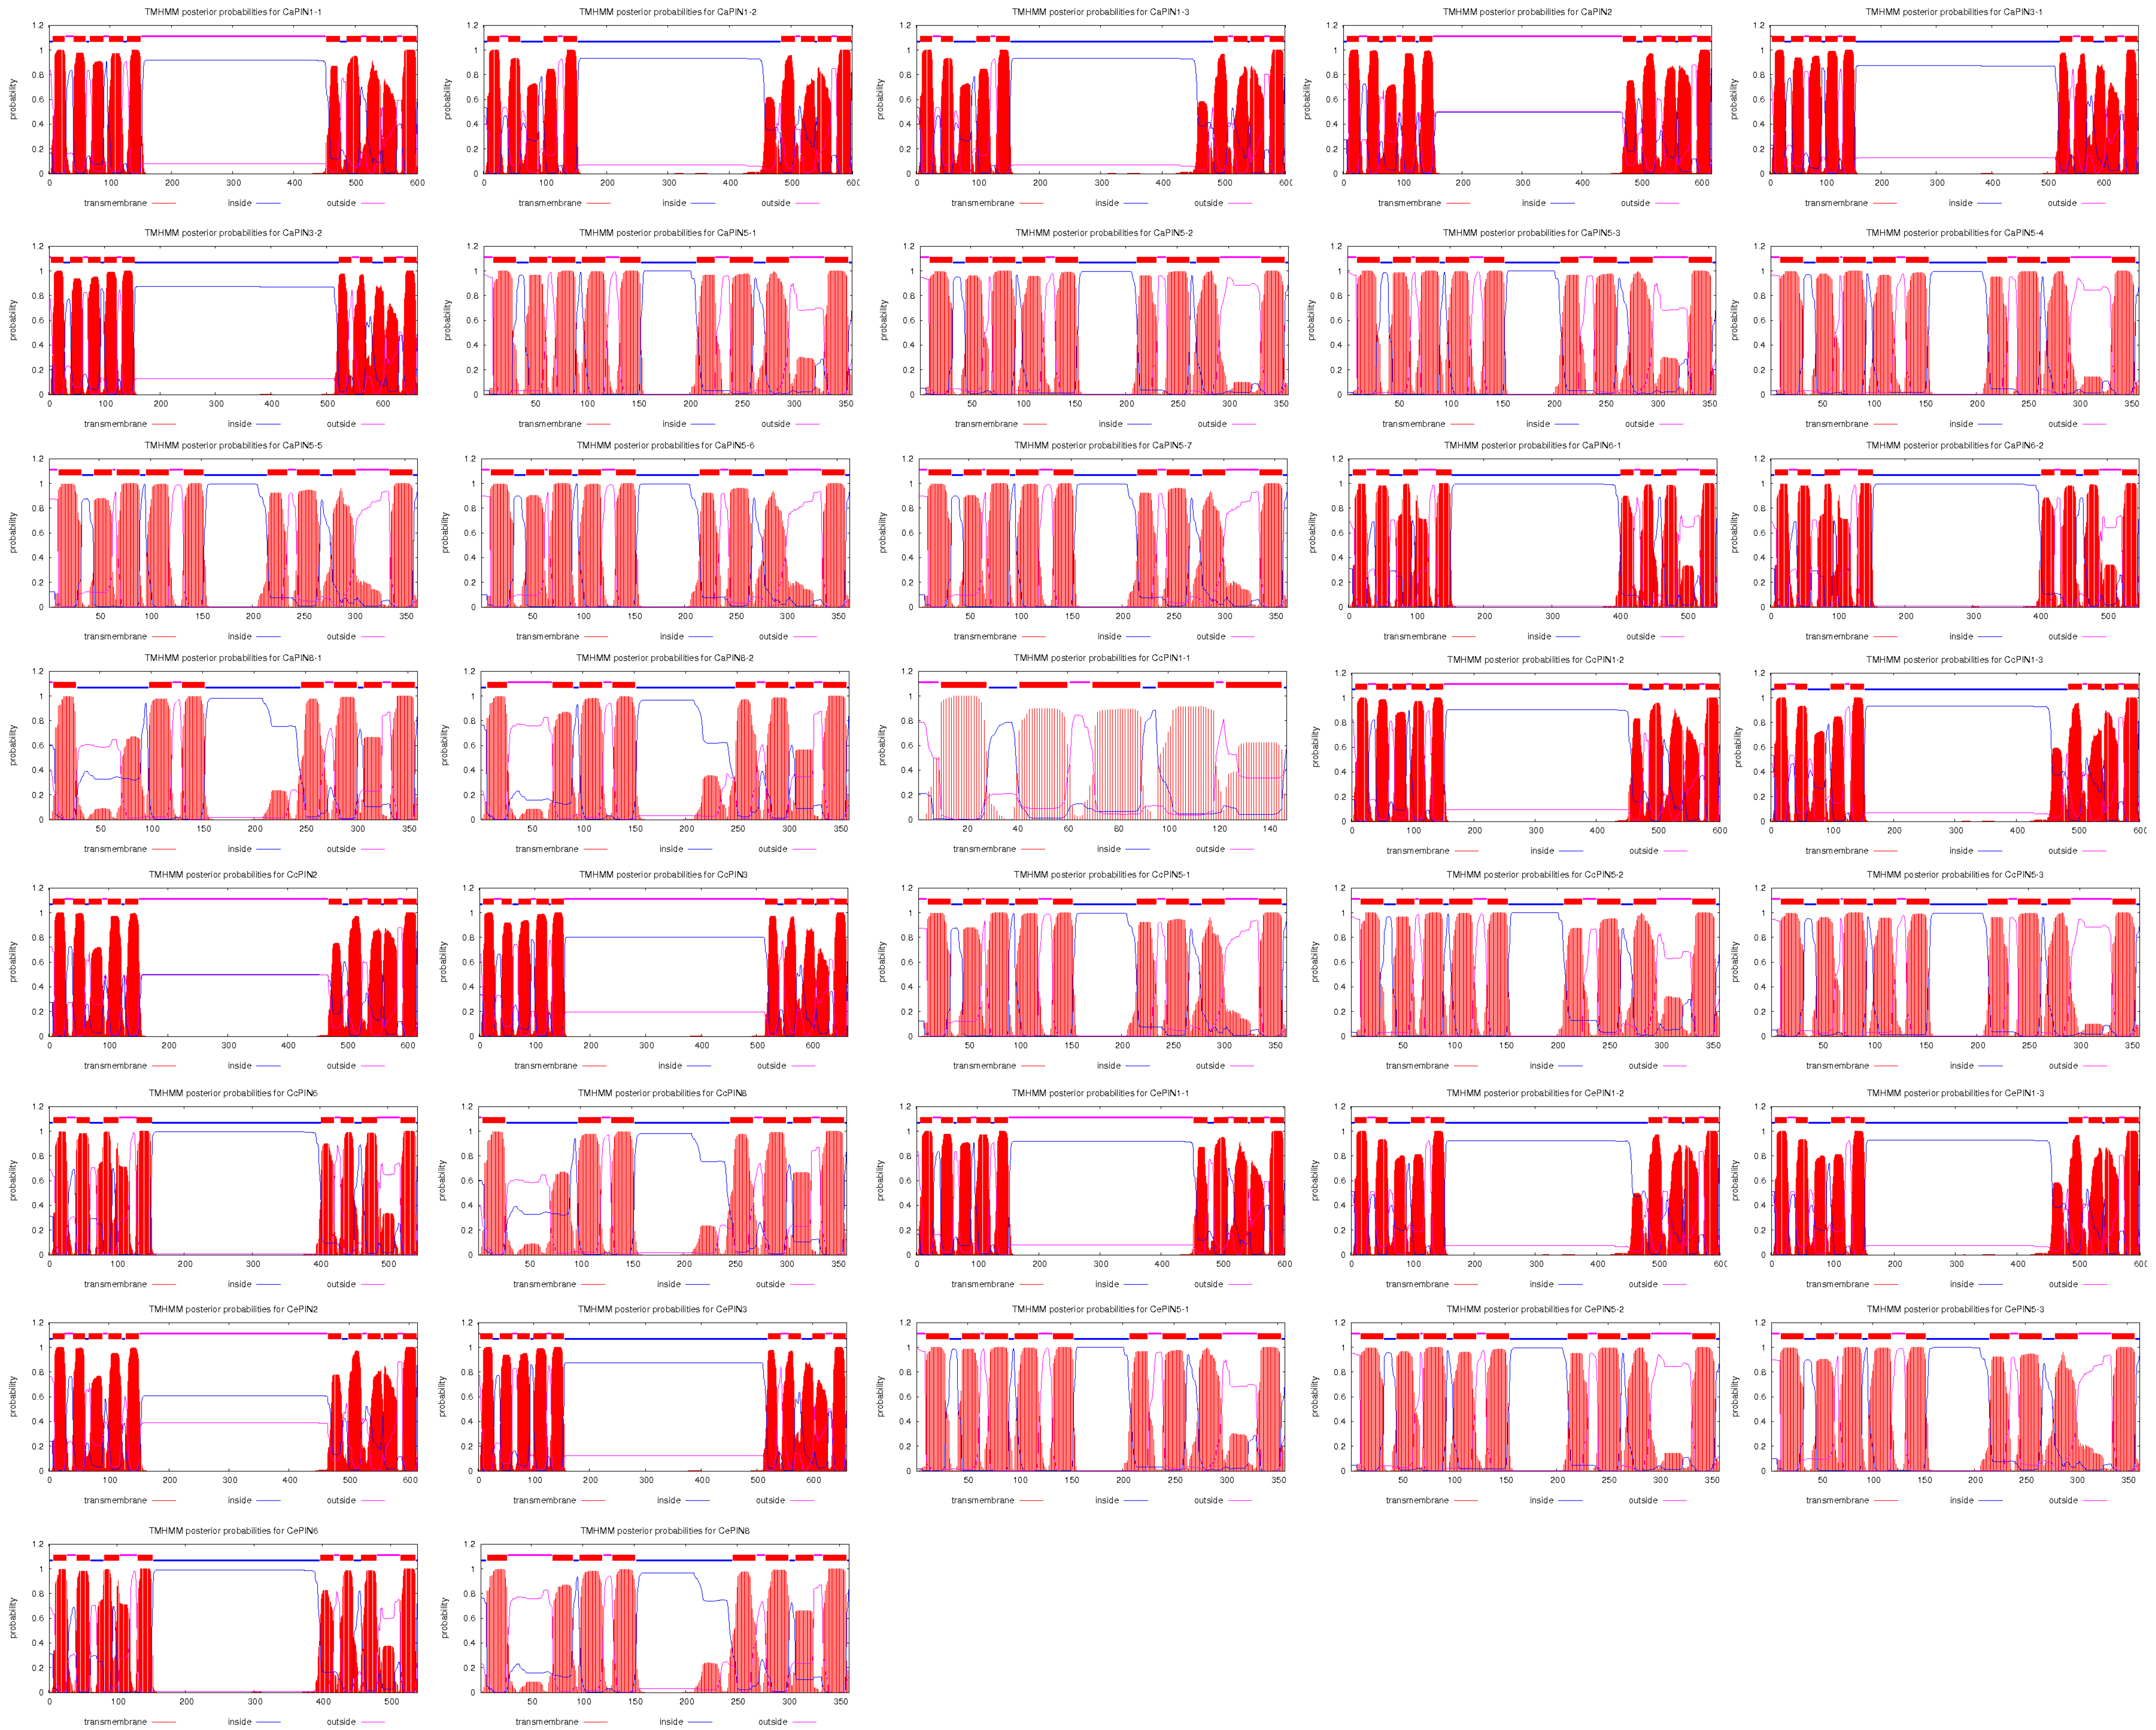

Supplement: s1 [file s1]
